# Supplementary material for: STING mediates immune responses in the closest living relatives of animals
Source: eLife journal article supplement (doi:10.7554/elife.70436), 2021-11-03
Supplement: supp2 [file elife-70436-supp2-v2.zip]

1944-1945
