# Supplementary material for: STING mediates immune responses in the closest living relatives of animals
Source: eLife. 2021 Nov 3;10:e70436. doi: 10.7554/eLife.70436 (PMC8592570; doi:10.7554/eLife.70436)
Supplement: Supplementary file 1. [file elife-70436-supp1.xlsx]

## Sheet: Choanoflagellate strains
Species	Strain	Transfected construct	Source or reference	Identifier or accession
Monosiga brevicollis	MX1	-	Abedin et al. 2008	ATCC PRA-258
Monosiga brevicollis	MX1	pEFL-pac-P2A-mTFP-3'act	This study
Monosiga brevicollis	MX1	pEFL-pac-P2A-STING-mTFP-3'act	This study
Monosiga brevicollis	MX1	pEFL-pac-P2A-mCherry-Atg8--3'act	This study
Monosiga brevicollis	STING–	none	This study
Monosiga brevicollis	STING–	pEFL-pac-P2A-STING-mTFP-3'act	This study
Monosiga brevicollis	STING–	pEFL-pac-P2A-mCherry-Atg8--3'act	This study
Salpingoeca rosetta	SrEp	-	Levin et al. 2013	ATCC PRA-390
Salpingoeca macrocollata		-	Richter et al. 2018	ATCC 50938
Salpingoea infusionum		-	Richter et al. 2018	ATCC 50559
Salpingoeca punica		-	Richter et al. 2018	ATCC 50788

## Sheet: Reporter constructs
					Cloning Detials for New Constructs
Source	Addgene ID	Name	Description		Insert			Backbone			Primers
					Name	Source	NCBI Reference	Name	Source	Antibiotic Resistance	Set 1 - Forward	Set 1 -Reverse	Set 2 - Forward	Set 2 -Reverse
Booth et al. 2018	NK606	pDSB_0051	pEFL–nanoluc		nanoluc
Booth et al. 2018	NK633	pDSB_0093	pEFL–mTFP1–3'act		mTFP1
Booth et al. 2018	NK624	pDSB_0071	pActAvrII–SigSeq-mCherry-HDEL		S. rosetta HDEL Sequence (from PTSG_07223)
Booth et al. 2018	NK617	pDSB_0063	pActAvrII–TargetSeq-mCherry		S. cerevisiae Cox4 target sequence
Monika Abedin Sigg		pMS0063	pEFL-pac-P2A-mTFP-3'act		M. brevicollis pEFL sequence	gDNA	XM_001745603.1	pDSB_0051	Booth et al. 2018	Ampicillin	accatgattacgccaagcttGAAGATAAGAACAAGTCAACGAAACGCAC	ttgtactccgtaccagacatGTCACGCTCGGGGATGCC	ATGTCTGGTACGGAGTAC	AAGCTTGGCGTAATCATG
This study		pSAW_0101	pEFL-pac-P2A-STING--3'act		pEFL-STING	cDNA	XM_001744134.1	pMS0063	Monika Abedin Sigg	Ampicillin	ATG GTC TCC AAG GGC GAG	GGG TCC GGG GTT CTC TTC	TTG AAG AGA ACC CCG GAC CCA TGA TGG TTA ATC TCT CTG ATC TTT CAC ATC TCT CTC AG	TCC TCG CCC TTG GAG ACC ATG GAG CCA CCG CTA CCG CC
This study		pSAW_0102	pEFL-pac-P2A-STING-mTFP-3'act		STING–mTFP1	cDNA	XM_001744134.1	pSAW_0101	This study	Ampicillin	gtcatcaccgaaacgcgcgaGACGAAAGGGCCTCGTGATAC	TGGCATCGCATACTGGTC	aggaccagtatgcgatgccaGGCGGTAGCGGTGGCTCC	TCGCGCGTTTCGGTGATGAC
This study		pSAW_0123	pEFL-pac-P2A-mTFP-Atg8--3'act		Atg8	cDNA	XM_001748054.1	pMS0063	Monika Abedin Sigg	Ampicillin	ACAAGGCATGCTCCATGAGCAAGTCCACG	GAGGCGCAGATCTTTAGCAGGCTGAAAGCA		CTGCTAAAGATCTGCGCCTCGTTGGTCATTG
This study		pSAW_0124	pEFL-pac-P2A-mCherry-Atg8--3'act		mCherry-Atg8	gBlock	AAV52164.1	pSAW_0123	This study	Ampicillin	CAAGATGGAGCGCGCTTCTGGCGGTAGCGG	TGCTGGGGGGAGCTCTTAAGACTTGTAAAGCTCGTCCATAC

## Sheet: CRISPR guides and primers
Gene	Accession	gRNA	Repair Oligo	PCR primer F	PCR Primer R	Sequencing primer
STING	Monbrdraft_6842	TTTCGGGATTCAGATGTGGG	TATTGCCGGCGACCGTGCCGCTCTCGAAGAACGGTTTCGGGATTCAGATGTtttatttaattaaataaaGGGCGGCATGCGAGTTCCCCGCAAGCTTTACaTTCTg	ATG ATG GTT AAT CTC TCT GAT CTT TCA CAT C	TTA TGG CAT CGC ATA CTG GTC C	ATG ATG GTT AAT CTC TCT GAT CTT TCA CAT C
rpl36a	Monbrdraft_13723	CTTCTTGTGGAAGACGGGCT	TCGCCTCCAATGACATGCATGAGACAAGCACCTTCTTGTGGAAGACctgCTTGGTCTGACCACCGAAACCGGACTGCTTGCGATCGTAACGACGCTTACCC	GCC CAA GAA CCG CAA GAC	GAG AGC CTT CTG CGA CTT GTA C	GCA CAC GCT GCA CAA GAT CAC

## Sheet: Antibodies
Primary Antibodies
Target	Source	Cat. No.	Dilution	Method
Tubulin E7 (mouse)	Developmental Studies Hybridoma Bank, University of Iowa, Iowa City, IA	AB_2315513	1:100 dilution (~50ng/uL)	IF
STING PAC-13727,13728 (rabbit)	Pacific Immunology	n/a	1:200 dilution (~20 ng/mL)	IF
dsRed (rabbit)	Takara	632496	1:200 dilution	IF
mWasabi AU775 (rabbit)	Geneva Ab Facility	n/a	1:100 dilution	IF
Alpha tubulin (mouse)	Sigma Aldrich	T64074	1:7000 dilution	WB
STING PAC-13727,13728 (rabbit)	Pacific Immunology	n/a	1:2000 dilution	WB
mCherry 16D7 (rat)	Invitrogen	M11217	1:2000 dilution	WB
dsRed (rabbit)	Takara	632496	1:2000 dilution	WB
Secondary Antibodies
Target	Source	Cat. No.	Concentration/Dilution	Method
Alexa Flour 488 (goat anti mouse)	Invitrogen	A28175	1:7500 dilution	IF
Alexa Flour 568 (donkey anti-rabbit)	Invitrogen	A10042	1:7500 dilution	IF
Alexa Fluor 647 (goat anti mouse)	Invitrogen	A32728	1:7500 dilution	IF
Goat anti-Mouse IgG (H+L) Secondary Antibody, HRP	Invitrogen	62-6520	1:7500 dilution	WB
Goat anti-Rabbit IgG (H+L) Secondary Antibody, HRP	Invitrogen	65-6120	1:7500 dilution	WB
Goat anti-Rat IgG (H+L) Secondary Antibody, HRP	Invitrogen	31470	1:7500 dilution	WB

## Sheet: Choanoflagellate media recipes
Artificial Seawater (ASW)		g/L
Tropic Marin Sea Salts		32.9
To achieve a final pH 8.0 after autoclaving, adjust seawater to pH 7.0 with HCl prior to autoclaving.
Sea Water Complete Media		g/L in ASW
Peptone		5
Yeast Extract		3
Glycerol		3 mL
Cereal Grass Media		g/L in ASW
Cereal Grass (from Carolina Biological Supply Co, Burlington, NC; Cat. No. 132375)		10
High Nutrient Media		Percent
Sea Water Complete		0.025
Cereal Grass Media		0.1
Low Nutrient Media		Percent
Sea Water Complete		0.0125
Cereal Grass Media		0.05

## Sheet: Chemicals and Reagents
Chemical	Source	Identifier
2’3’cGAMP	Cayman Chemical	19887
3’3’cGAMP	Cayman Chemical	17966
Ampicilin	Sigma Aldrich	A9518
Chloroquine	Sigma Aldrich	C6628
ci-di-AMP	Invivogen	tlrl-nacda
ci-di-GMP	Invivogen	tlrl-nacdg
Cycloheximide	Sigma Aldrich	1810
Fluorspheres 0.2um blue	Invitrogen	F8805
Hoecsht 33342	Invitrogen	H3570
Lipopolysacchardie from E. coli O111:B4	Sigma Aldrich	L3012
Lipopolysacchardie from P. aeruginosa PA10	Sigma Aldrich	L9143
Phalloidin (Alexa Fluor 647)	Invitrogen	A22287
Puromycin	Sigma Aldrich	P8833
SG Cell Line 4D-NucleofectorTM X Kit S	Lonza	V4XC-3032
