# Supplementary figures and images for: STING mediates immune responses in the closest living relatives of animals
Source: eLife journal article supplement (doi:10.7554/elife.70436), 2021-11-03

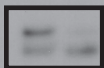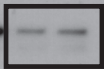

Supplement: supp2 [file elife-70436-supp2-v2.zip]

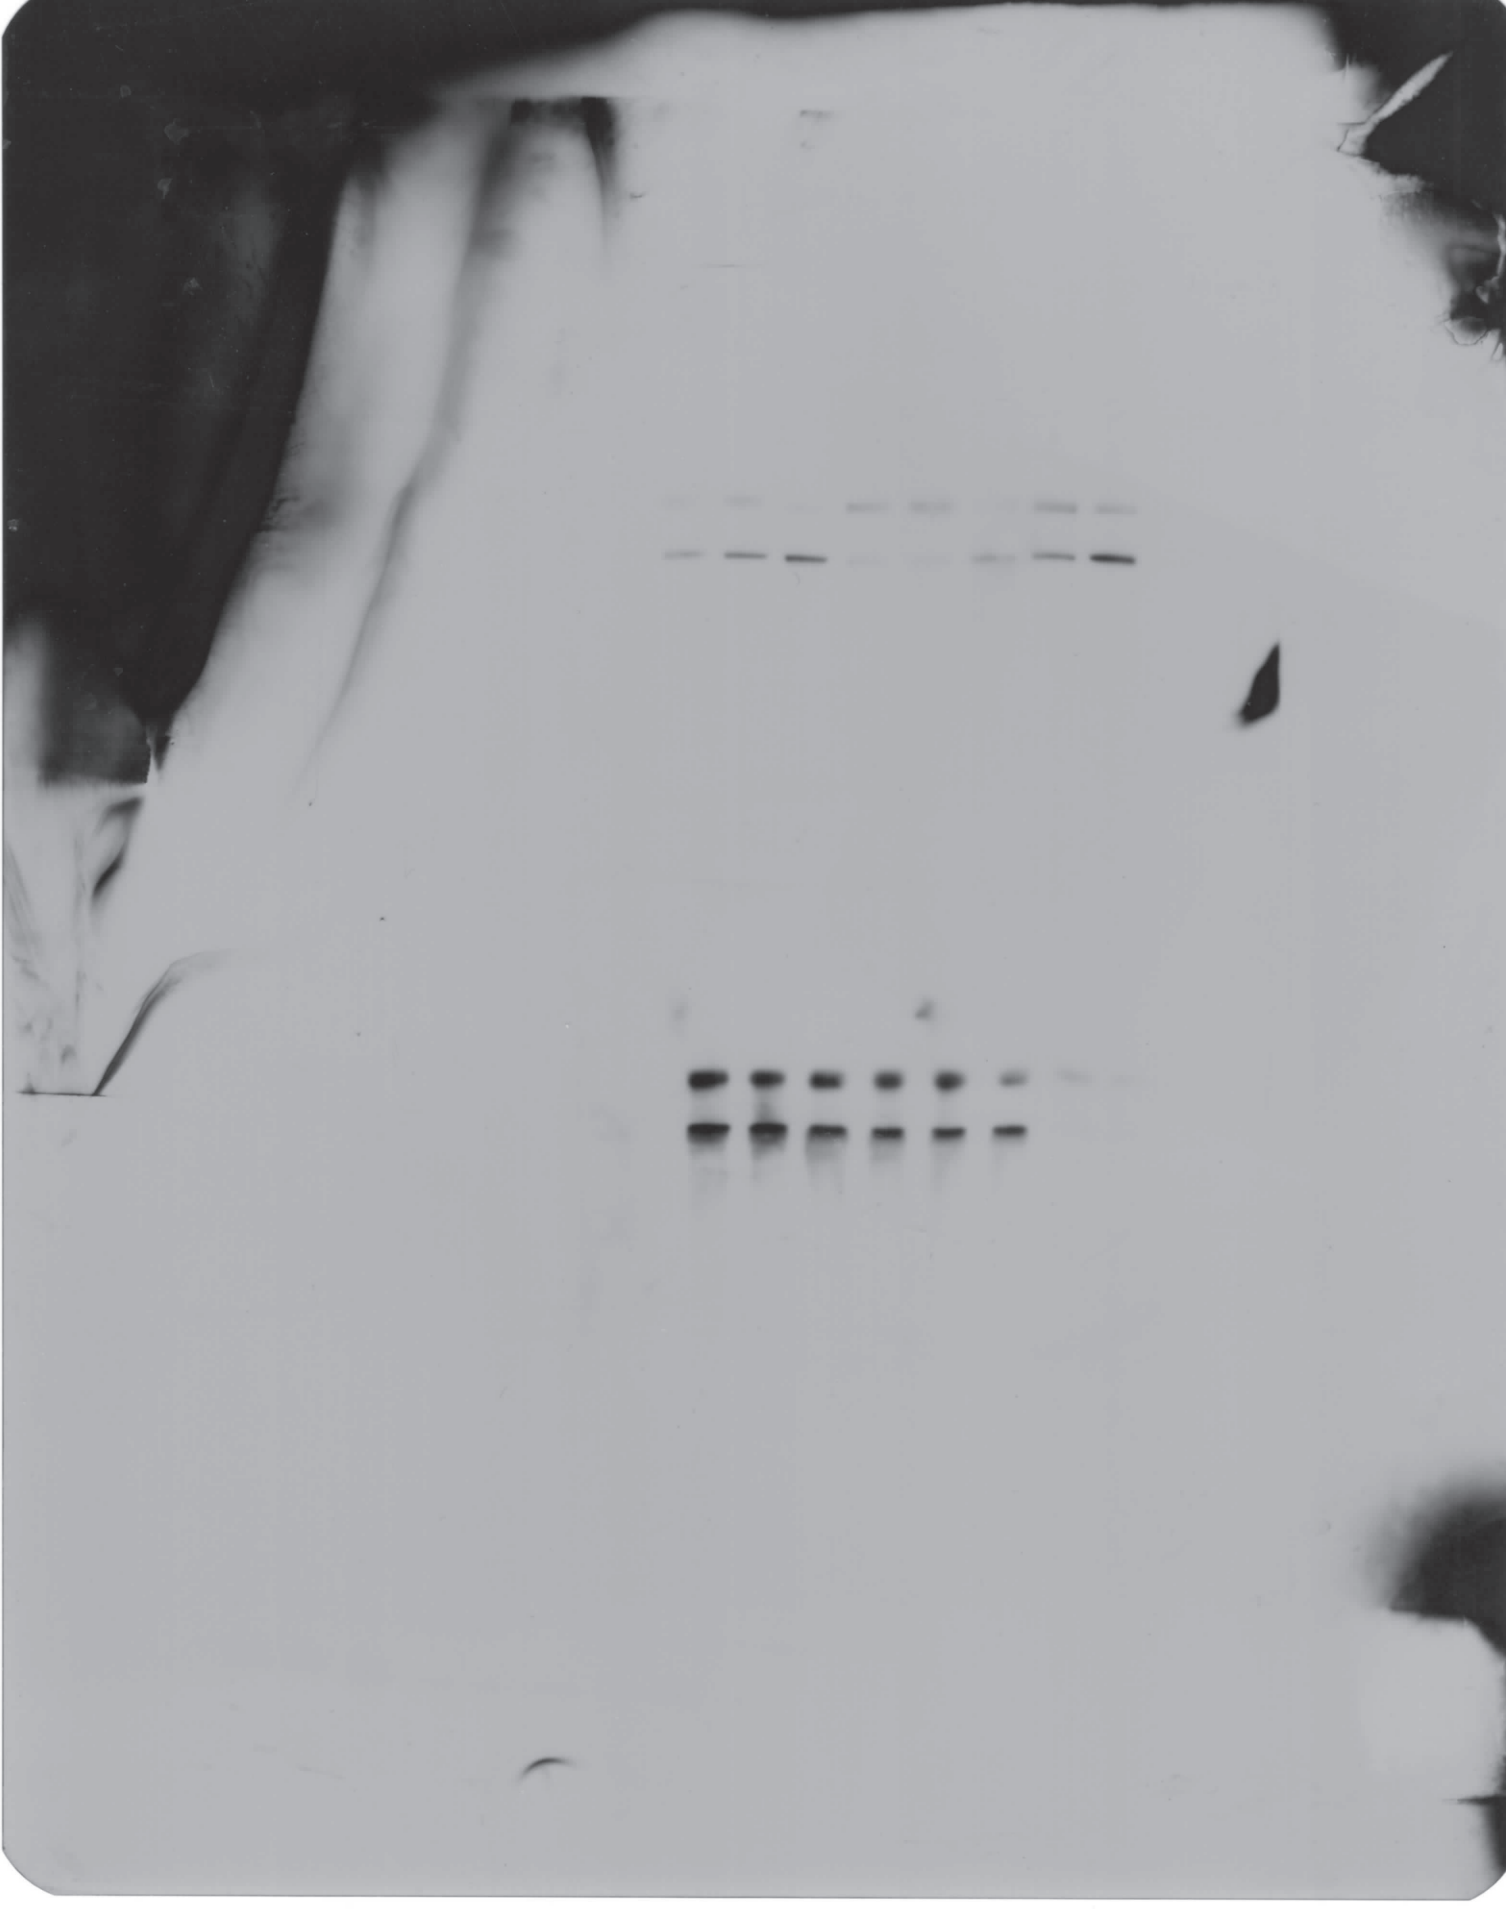

Supplement: supp2 [file elife-70436-supp2-v2.zip]

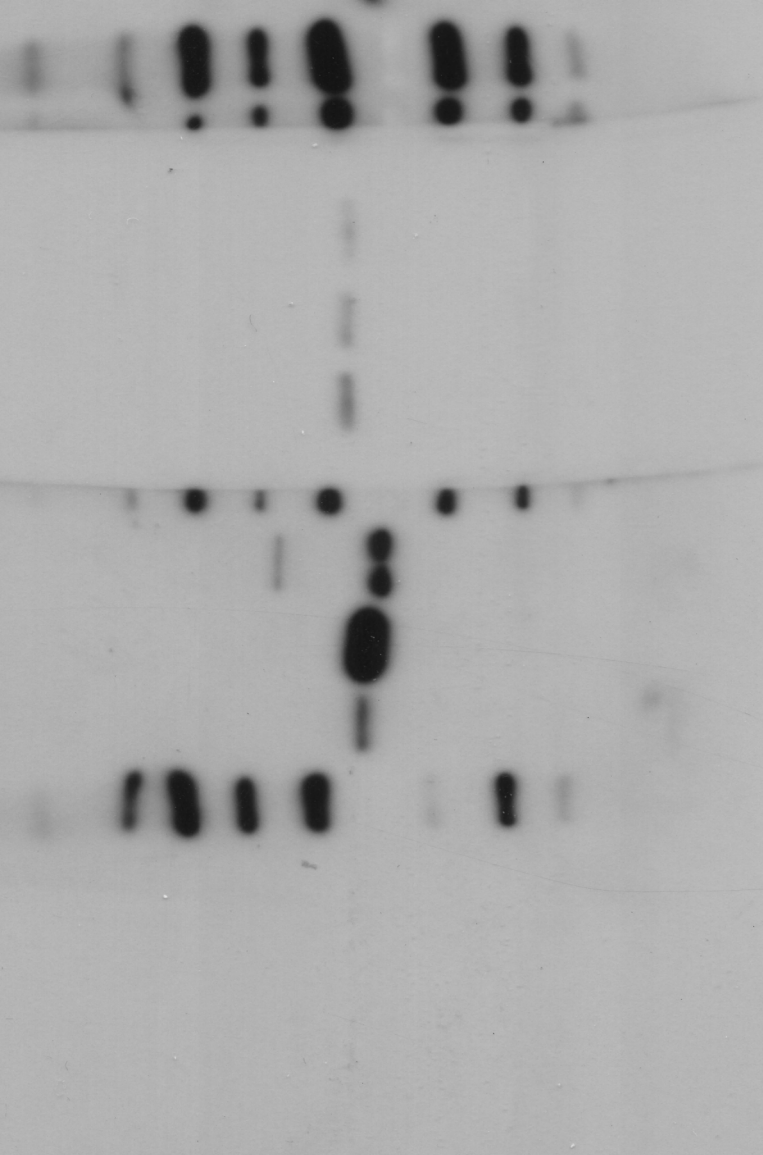

Supplement: supp2 [file elife-70436-supp2-v2.zip]

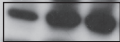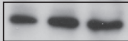

Supplement: supp2 [file elife-70436-supp2-v2.zip]

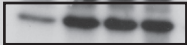

Supplement: supp2 [file elife-70436-supp2-v2.zip]

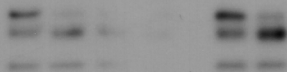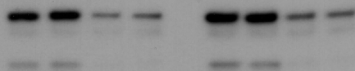

Supplement: supp2 [file elife-70436-supp2-v2.zip]

Tubulin

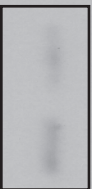

STING

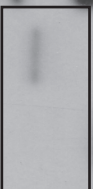

Supplement: supp2 [file elife-70436-supp2-v2.zip]

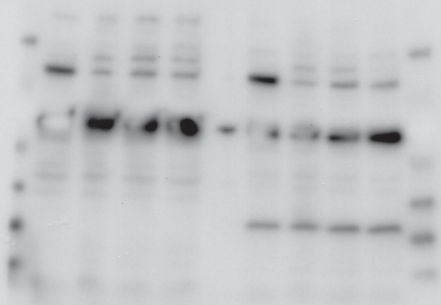

Supplement: supp2 [file elife-70436-supp2-v2.zip]

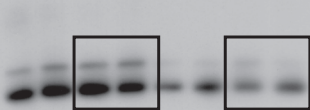

Supplement: supp2 [file elife-70436-supp2-v2.zip]

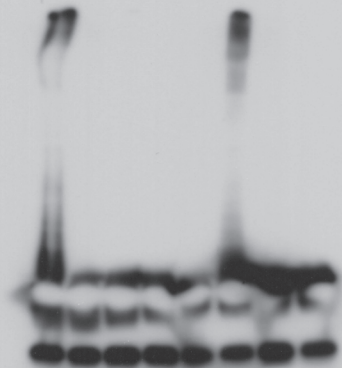

Supplement: supp2 [file elife-70436-supp2-v2.zip]

(1) → puffer LPS  
(2) → winter LPS  
(3) → invasive LPS ] for

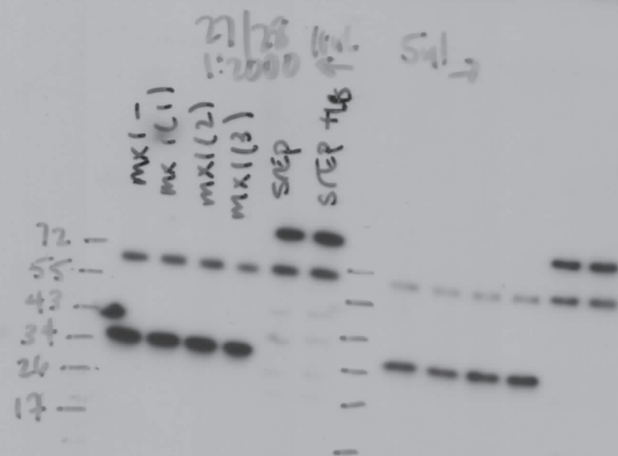

Supplement: supp2 [file elife-70436-supp2-v2.zip]

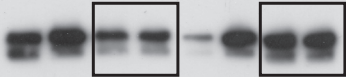

Supplement: supp2 [file elife-70436-supp2-v2.zip]

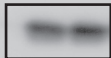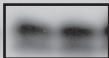

Supplement: supp2 [file elife-70436-supp2-v2.zip]

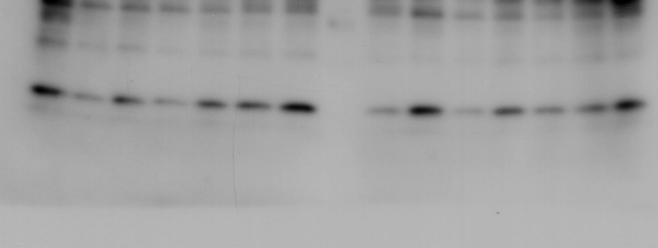

Supplement: supp2 [file elife-70436-supp2-v2.zip]

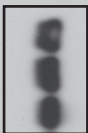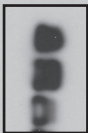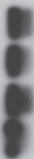

Supplement: supp2 [file elife-70436-supp2-v2.zip]

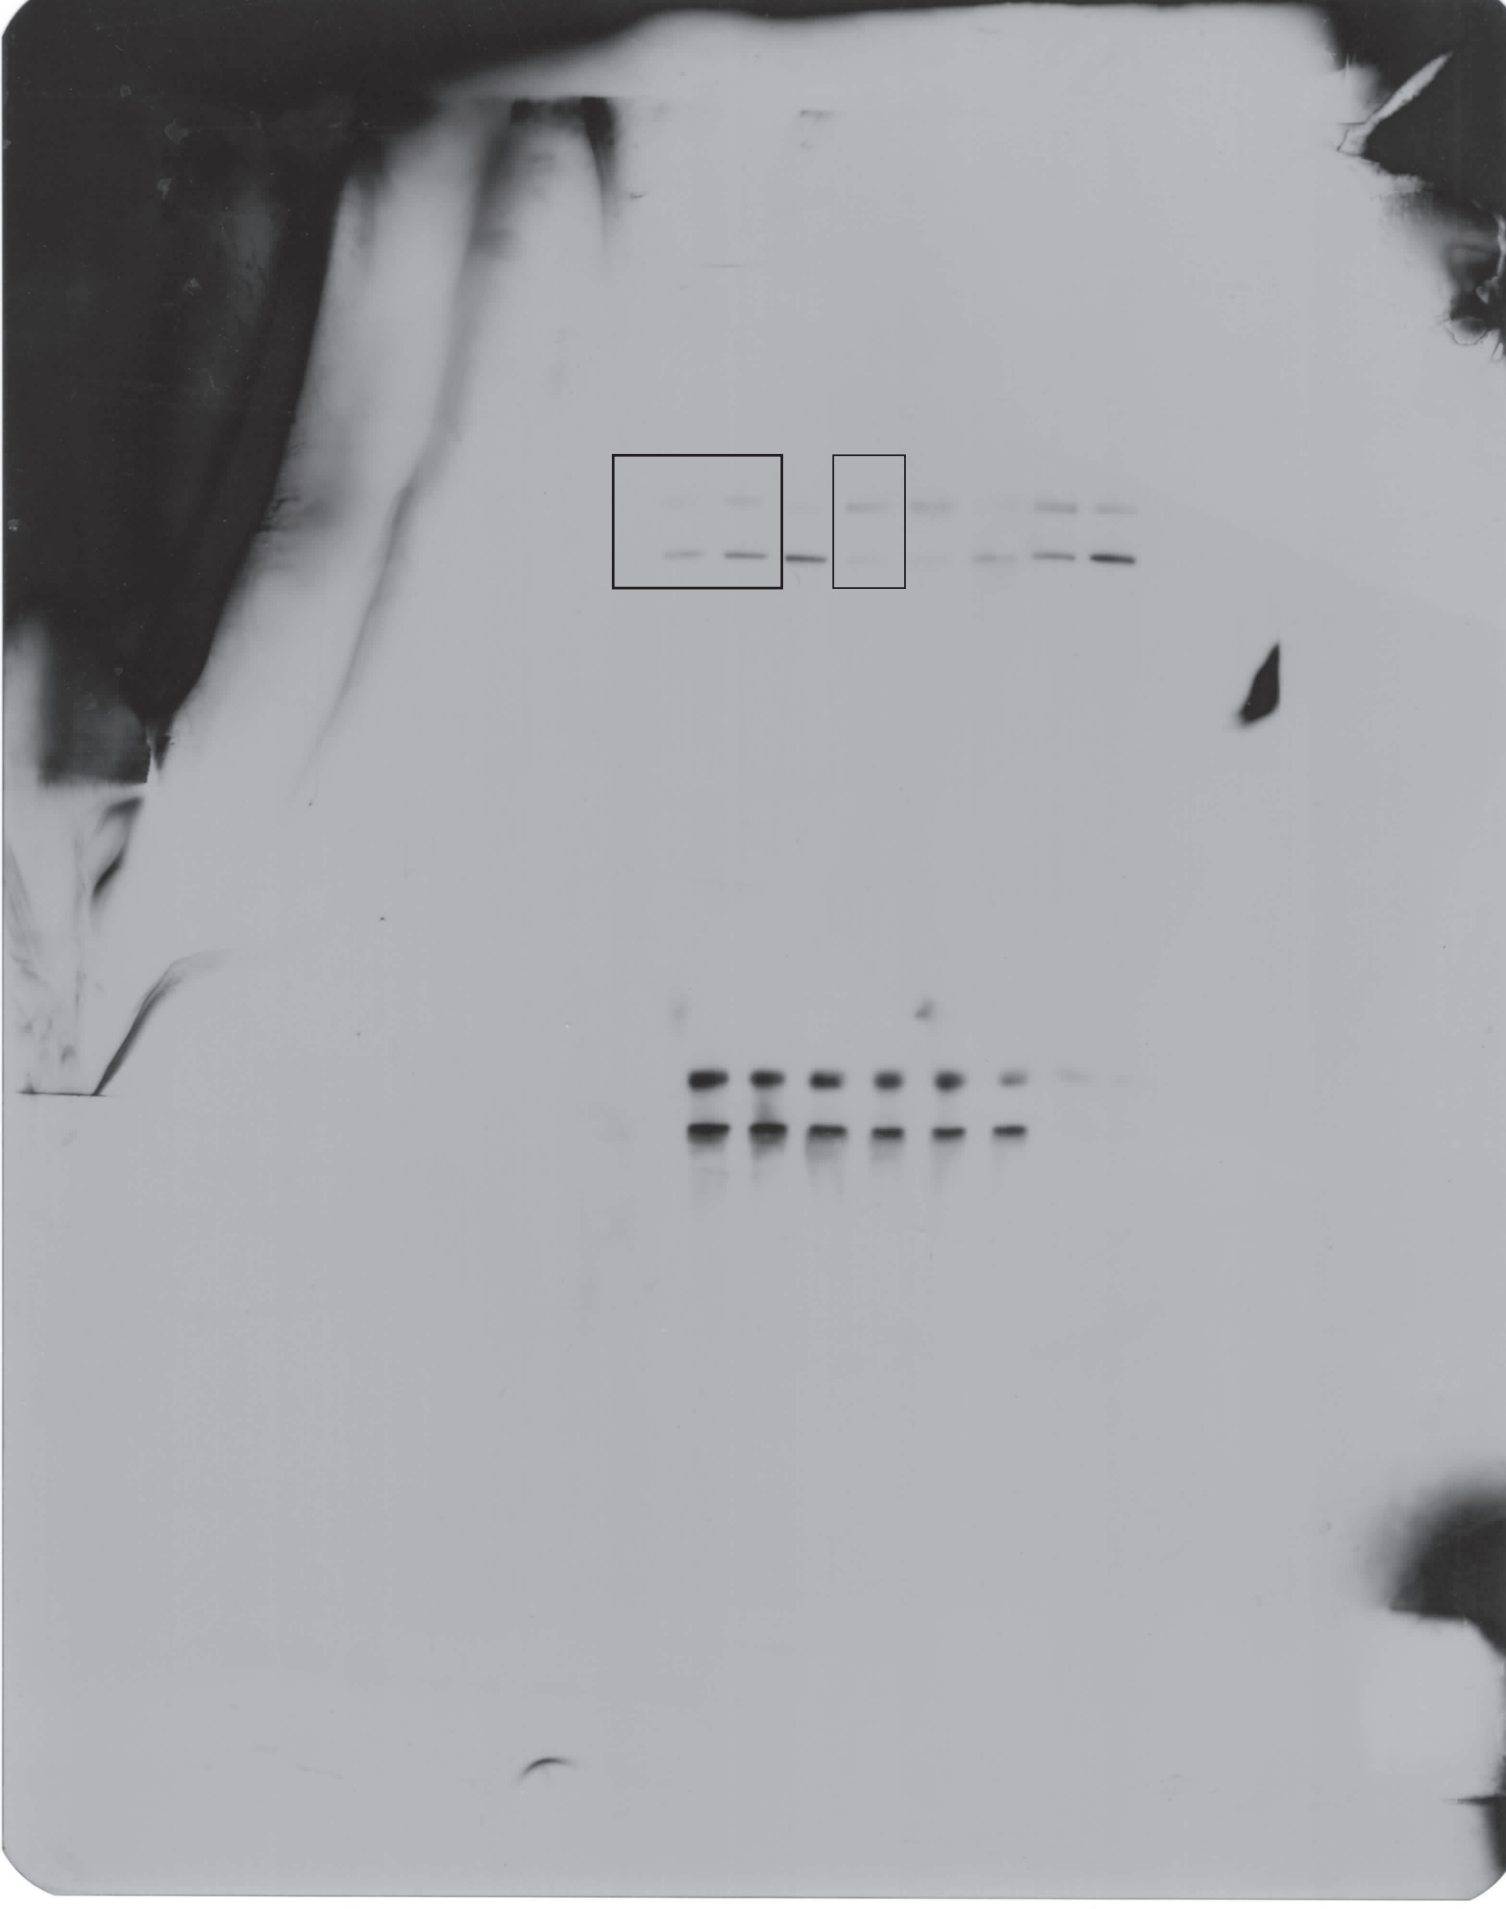

Supplement: supp2 [file elife-70436-supp2-v2.zip]

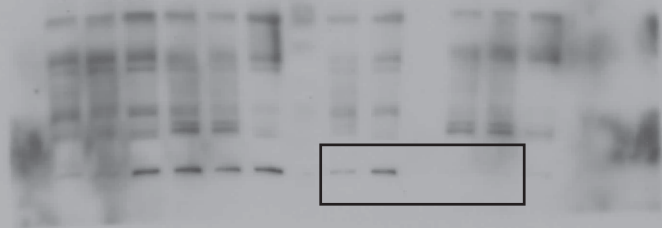

Supplement: supp2 [file elife-70436-supp2-v2.zip]

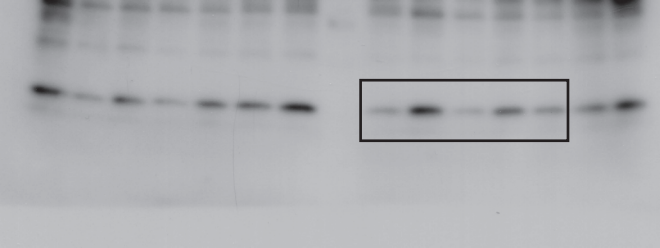

Supplement: supp2 [file elife-70436-supp2-v2.zip]

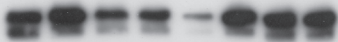

Supplement: supp2 [file elife-70436-supp2-v2.zip]

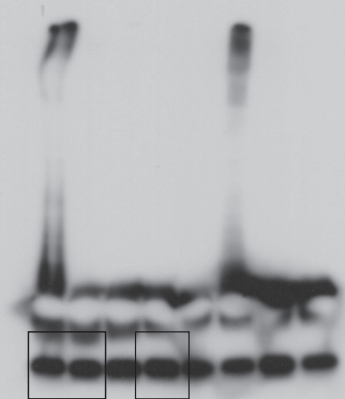

Supplement: supp2 [file elife-70436-supp2-v2.zip]

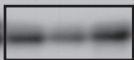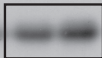

Supplement: supp2 [file elife-70436-supp2-v2.zip]

(1) → puffer LPS  
(2) → winter LPS  
(3) → inviscer LPS ] for



Supplement: supp2 [file elife-70436-supp2-v2.zip]

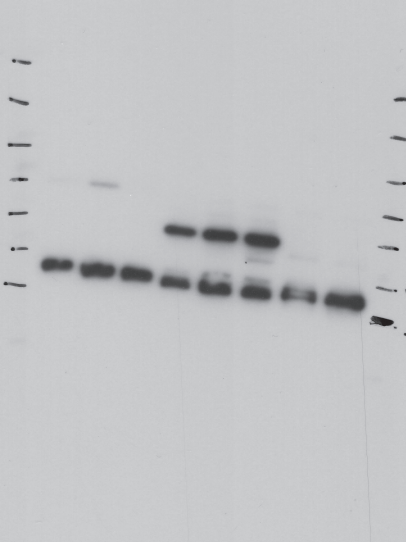

Supplement: supp2 [file elife-70436-supp2-v2.zip]

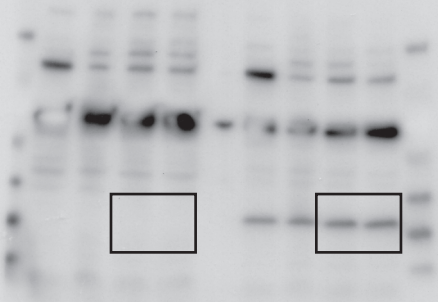

Supplement: supp2 [file elife-70436-supp2-v2.zip]

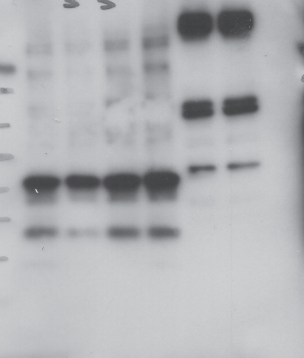

Supplement: supp2 [file elife-70436-supp2-v2.zip]

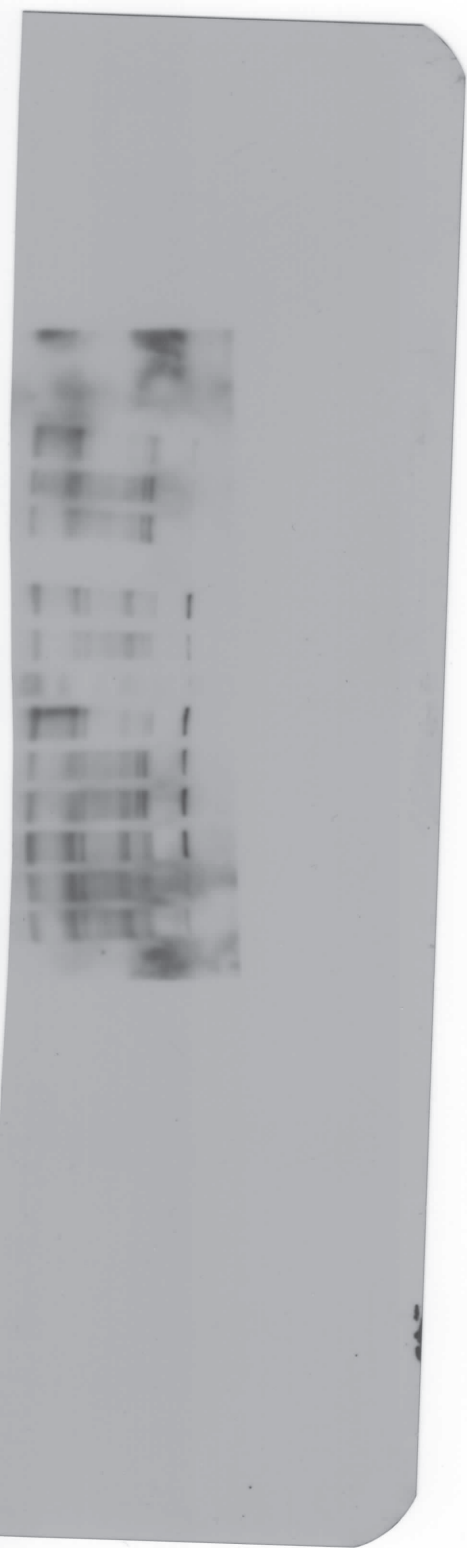

Supplement: supp2 [file elife-70436-supp2-v2.zip]

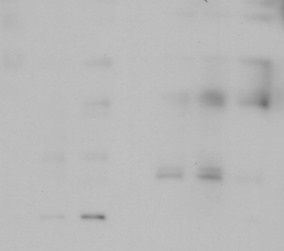

Supplement: supp2 [file elife-70436-supp2-v2.zip]

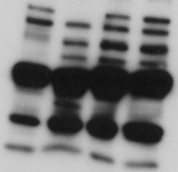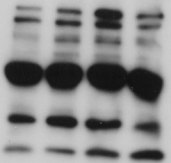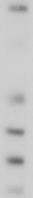

Supplement: supp2 [file elife-70436-supp2-v2.zip]

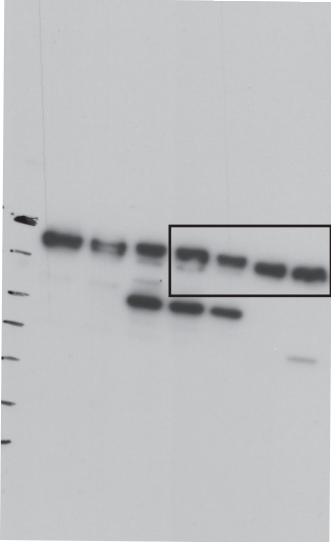

Supplement: supp2 [file elife-70436-supp2-v2.zip]

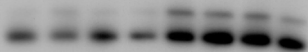

Supplement: supp2 [file elife-70436-supp2-v2.zip]

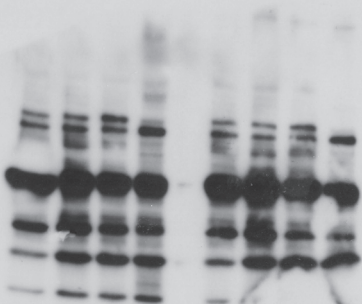

Supplement: supp2 [file elife-70436-supp2-v2.zip]

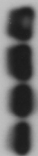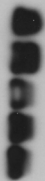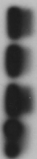

Supplement: supp2 [file elife-70436-supp2-v2.zip]
